# Supplementary material
Source: publisher site journal article supplement (https://www.degruyterbrill.com/publication/dbid/vdbo/downloadAsset/VDBO_VDBO_Titelliste.pdf)
Supplement: Supplementary file 1 [file VDBO_VDBO_Titelliste.pdf]

## Titelliste Verfasserdatenbank

Bereits in die Verfasserdatenbank integrierte Titel (Stand: März 2025):

| Titel                                                                                            | Herausgeber                     | ISBN              | Erschienen im Print |
|--------------------------------------------------------------------------------------------------|---------------------------------|-------------------|---------------------|
| ( <sup>2</sup> VL) Die deutsche Literatur des Mittelalters. Verfasserlexikon, 2. Auflage, Bd. 1  | Ruh, Kurt / Wachinger, Burghart | 978-3-11-007264-8 | 01.05.1978          |
| ( <sup>2</sup> VL) Die deutsche Literatur des Mittelalters. Verfasserlexikon, 2. Auflage, Bd. 2  | Ruh, Kurt / Wachinger, Burghart | 978-3-11-007699-8 | 01.01.1980          |
| ( <sup>2</sup> VL) Die deutsche Literatur des Mittelalters. Verfasserlexikon, 2. Auflage, Bd. 3  | Ruh, Kurt / Wachinger, Burghart | 978-3-11-008778-9 | 01.09.1981          |
| ( <sup>2</sup> VL) Die deutsche Literatur des Mittelalters. Verfasserlexikon, 2. Auflage, Bd. 4  | Ruh, Kurt / Wachinger, Burghart | 978-3-11-008838-0 | 01.04.1983          |
| ( <sup>2</sup> VL) Die deutsche Literatur des Mittelalters. Verfasserlexikon, 2. Auflage, Bd. 5  | Ruh, Kurt / Wachinger, Burghart | 978-3-11-009909-6 | 01.04.1985          |
| ( <sup>2</sup> VL) Die deutsche Literatur des Mittelalters. Verfasserlexikon, 2. Auflage, Bd. 6  | Ruh, Kurt / Wachinger, Burghart | 978-3-11-010754-8 | 01.05.1987          |
| ( <sup>2</sup> VL) Die deutsche Literatur des Mittelalters. Verfasserlexikon, 2. Auflage, Bd. 7  | Ruh, Kurt / Wachinger, Burghart | 978-3-11-011582-6 | 01.02.1990          |
| ( <sup>2</sup> VL) Die deutsche Literatur des Mittelalters. Verfasserlexikon, 2. Auflage, Bd. 8  | Ruh, Kurt / Wachinger, Burghart | 978-3-11-012690-7 | 01.12.1992          |
| ( <sup>2</sup> VL) Die deutsche Literatur des Mittelalters. Verfasserlexikon, 2. Auflage, Bd. 9  | Ruh, Kurt / Wachinger, Burghart | 978-3-11-014024-8 | 07.02.1996          |
| ( <sup>2</sup> VL) Die deutsche Literatur des Mittelalters. Verfasserlexikon, 2. Auflage, Bd. 10 | Ruh, Kurt / Wachinger, Burghart | 978-3-11-015606-5 | 20.12.1999          |
| ( <sup>2</sup> VL) Die deutsche Literatur des Mittelalters. Verfasserlexikon, 2. Auflage, Bd. 11 | Ruh, Kurt / Wachinger, Burghart | 978-3-11-016832-7 | 24.11.2004          |
| ( <sup>2</sup> VL) Die deutsche Literatur des Mittelalters. Verfasserlexikon, 2. Auflage, Bd. 12 | Ruh, Kurt / Wachinger, Burghart | 978-3-11-017673-5 | 18.12.2006          |
| ( <sup>2</sup> VL) Die deutsche Literatur des Mittelalters. Verfasserlexikon, 2. Auflage, Bd. 13 | Ruh, Kurt / Wachinger, Burghart | 978-3-11-019116-5 | 18.12.2007          |
| ( <sup>2</sup> VL) Die deutsche Literatur des Mittelalters. Verfasserlexikon, 2. Auflage, Bd. 14 | Ruh, Kurt / Wachinger, Burghart | 978-3-11-019650-4 | 19.12.2008          |
| (VLHUM) Deutscher Humanismus 1480-1520. Verfasserlexikon, Bd. 1                                  | Worstbrock, Franz Josef         | 978-3-11-020639-5 | 29.01.2009          |
| (VLHUM) Deutscher Humanismus 1480-1520. Verfasserlexikon, Bd. 2                                  | Worstbrock, Franz Josef         | 978-3-11-033395-4 | 31.10.2013          |
| (VLHUM) Deutscher Humanismus 1480-1520. Verfasserlexikon, Bd. 3                                  | Worstbrock, Franz Josef         | 978-3-11-034546-9 | 12.12.2014          |
| Killy Literaturlexikon. Autoren und Werke des deutschsprachigen Kulturraums, 2. Auflage, Bd. 1   | Kühlmann, Wilhelm               | 978-3-11-018962-9 | 15.07.2008          |
| Killy Literaturlexikon. Autoren und Werke des deutschsprachigen Kulturraums, 2. Auflage, Bd. 2   | Kühlmann, Wilhelm               | 978-3-11-020375-2 | 15.07.2008          |
| Killy Literaturlexikon. Autoren und Werke des deutschsprachigen Kulturraums, 2. Auflage, Bd. 3   | Kühlmann, Wilhelm               | 978-3-11-020376-9 | 15.07.2008          |
| Killy Literaturlexikon. Autoren und Werke des deutschsprachigen Kulturraums, 2. Auflage, Bd. 4   | Kühlmann, Wilhelm               | 978-3-11-021389-8 | 16.09.2009          |
| Killy Literaturlexikon. Autoren und Werke des deutschsprachigen Kulturraums, 2. Auflage, Bd. 5   | Kühlmann, Wilhelm               | 978-3-11-021391-1 | 16.09.2009          |
| Killy Literaturlexikon. Autoren und Werke des deutschsprachigen Kulturraums, 2. Auflage, Bd. 6   | Kühlmann, Wilhelm               | 978-3-11-021393-5 | 16.09.2009          |
| Killy Literaturlexikon. Autoren und Werke des deutschsprachigen Kulturraums, 2. Auflage, Bd. 7   | Kühlmann, Wilhelm               | 978-3-11-022048-3 | 17.09.2010          |
| Killy Literaturlexikon. Autoren und Werke des deutschsprachigen Kulturraums, 2. Auflage, Bd. 8   | Kühlmann, Wilhelm               | 978-3-11-022046-9 | 17.09.2010          |
| Killy Literaturlexikon. Autoren und Werke des deutschsprachigen Kulturraums, 2. Auflage, Bd. 9   | Kühlmann, Wilhelm               | 978-3-11-022044-5 | 17.09.2010          |
| Killy Literaturlexikon. Autoren und Werke des deutschsprachigen Kulturraums, 2. Auflage, Bd. 10  | Kühlmann, Wilhelm               | 978-3-11-022042-1 | 28.09.2011          |
| Killy Literaturlexikon. Autoren und Werke des deutschsprachigen Kulturraums, 2. Auflage, Bd. 11  | Kühlmann, Wilhelm               | 978-3-11-022040-7 | 28.09.2011          |

|                                                                                                    |                                                                                                                               |                   |            |
|----------------------------------------------------------------------------------------------------|-------------------------------------------------------------------------------------------------------------------------------|-------------------|------------|
| Killy Literaturlexikon. Autoren und Werke des deutschsprachigen Kulturraums, 2. Auflage, Bd. 12    | Kühlmann, Wilhelm                                                                                                             | 978-3-11-022038-4 | 28.09.2011 |
| Killy Literaturlexikon. Autoren und Werke des deutschsprachigen Kulturraums, 2. Auflage, Bd. 13    | Kühlmann, Wilhelm                                                                                                             | 978-3-11-022028-5 | 14.09.2012 |
| (VL16) Frühe Neuzeit in Deutschland 1520-1620. Literaturwissenschaftliches Verfasserlexikon, Bd. 1 | Kühlmann, Wilhelm / Müller, Jan-Dirk / Schilling, Michael / Steiger, Johann Anselm / Vollhardt, Friedrich                     | 978-3-11-022391-0 | 17.10.2011 |
| (VL16) Frühe Neuzeit in Deutschland 1520-1620. Literaturwissenschaftliches Verfasserlexikon, Bd. 2 | Kühlmann, Wilhelm / Müller, Jan-Dirk / Schilling, Michael / Steiger, Johann Anselm / Vollhardt, Friedrich                     | 978-3-11-025486-0 | 20.12.2012 |
| (VL16) Frühe Neuzeit in Deutschland 1520-1620. Literaturwissenschaftliches Verfasserlexikon, Bd. 3 | Kühlmann, Wilhelm / Müller, Jan-Dirk / Schilling, Michael / Steiger, Johann Anselm / Vollhardt, Friedrich                     | 978-3-11-025487-7 | 13.05.2014 |
| (VL16) Frühe Neuzeit in Deutschland 1520-1620. Literaturwissenschaftliches Verfasserlexikon, Bd. 4 | Kühlmann, Wilhelm / Müller, Jan-Dirk / Schilling, Michael / Steiger, Johann Anselm / Vollhardt, Friedrich                     | 978-3-11-025488-4 | 12.06.2015 |
| (VL16) Frühe Neuzeit in Deutschland 1520-1620. Literaturwissenschaftliches Verfasserlexikon, Bd. 5 | Kühlmann, Wilhelm / Müller, Jan-Dirk / Schilling, Michael / Steiger, Johann Anselm / Vollhardt, Friedrich                     | 978-3-11-025489-1 | 20.06.2016 |
| (VL16) Frühe Neuzeit in Deutschland 1520-1620. Literaturwissenschaftliches Verfasserlexikon, Bd. 6 | Kühlmann, Wilhelm / Müller, Jan-Dirk / Schilling, Michael / Steiger, Johann Anselm / Vollhardt, Friedrich                     | 978-3-11-025490-7 | 20.03.2017 |
| (VL16) Frühe Neuzeit in Deutschland 1520-1620. Literaturwissenschaftliches Verfasserlexikon, Bd. 7 | Kühlmann, Wilhelm / Müller, Jan-Dirk / Schilling, Michael / Steiger, Johann Anselm / Vollhardt, Friedrich                     | 978-3-11-035502-4 | 03.12.2018 |
| (VL17) Frühe Neuzeit in Deutschland 1620-1720. Literaturwissenschaftliches Verfasserlexikon, Bd. 1 | Arend Stefanie / Jahn, Bernhard / Robert, Jörg / Seidel, Robert/ Steiger, Johann Anselm / Tilg, Stefan / Vollhardt, Friedrich | 978-3-11-054768-9 | 17.12.2018 |
| (VL17) Frühe Neuzeit in Deutschland 1620-1720. Literaturwissenschaftliches Verfasserlexikon, Bd. 2 | Arend Stefanie / Jahn, Bernhard / Robert, Jörg / Seidel, Robert/ Steiger, Johann Anselm / Tilg, Stefan / Vollhardt, Friedrich | 978-3-11-066873-5 | 23.11.2020 |
| (VL17) Frühe Neuzeit in Deutschland 1620-1720. Literaturwissenschaftliches Verfasserlexikon, Bd. 3 | Arend Stefanie / Jahn, Bernhard / Robert, Jörg / Seidel, Robert/ Steiger, Johann Anselm / Tilg, Stefan / Vollhardt, Friedrich | 978-3-11-073123-1 | 20.12.2021 |
| (VL17) Frühe Neuzeit in Deutschland 1620-1720. Literaturwissenschaftliches Verfasserlexikon, Bd. 4 | Arend Stefanie / Jahn, Bernhard / Robert, Jörg / Seidel, Robert/ Steiger, Johann Anselm / Tilg, Stefan / Vollhardt, Friedrich | 978-3-11-077112-1 | 31.12.2023 |
| (VL17) Frühe Neuzeit in Deutschland 1620-1720. Literaturwissenschaftliches Verfasserlexikon, Bd. 5 | Arend Stefanie / Jahn, Bernhard / Robert, Jörg / Seidel, Robert/ Steiger, Johann Anselm / Tilg, Stefan / Vollhardt, Friedrich | 978-3-11-077113-8 | 30.12.2024 |

März 2025
